# Supplementary material for: A Metabonomics Profiling Study on Phlegm Syndrome and Blood-Stasis Syndrome in Coronary Heart Disease Patients Using Liquid Chromatography/Quadrupole Time-of-Flight Mass Spectrometry
Source: Evid Based Complement Alternat Med. 2014 Jul 20;2014:385102. doi: 10.1155/2014/385102 (PMC4129150; doi:10.1155/2014/385102)
Supplement: Supplementary file 1 — The Supplementary Material Depicted the Clinical Data and Treatment of Each Coronary Heart Disease Patients and Healthy Control. [file 385102.f1.zip]

Archive with 2 entries (2 files):
- mat.385102.v2.xls
- mat.385102.v3.xls
