# Supplementary material for: A Metabonomics Profiling Study on Phlegm Syndrome and Blood-Stasis Syndrome in Coronary Heart Disease Patients Using Liquid Chromatography/Quadrupole Time-of-Flight Mass Spectrometry
Source: Evid Based Complement Alternat Med. 2014 Jul 20;2014:385102. doi: 10.1155/2014/385102 (PMC4129150; doi:10.1155/2014/385102)
Supplement: Supplementary file 1 — The Supplementary Material Depicted the Clinical Data and Treatment of Each Coronary Heart Disease Patients and Healthy Control. [file 385102.f1.zip › mat.385102.v2.xls]

## Sheet: table1
NO	AGE	GENDER	BMI	TG	TC	LDL	HDL	APOA1	APOB	LDH	CK	CKMB	MYO	CTNL	GLU	HR	GROUP	HIGH	WEIGHT	HYPERTEN	DIABETES	drugs
103.00	71	2	23.6	3.26	3.5	1.22	0.7	1.33	0.99	164.2	71.7	19.2	30.3	0.06	4.52	60	1	147	51	0	0	clopidogrel, Lumbrukinase, fenofibrate, Micardis, aspirin
107.00	53	1	24.3	3.8	4.33	1.68	0.92	1.08	0.95	212.6	49.4	13	41	0.04	4.56	60	1	178	77	1	0	clopidogrel, atorvastatin, Micardis, aspirin
115.00	61	1	24.57	0.75	4.77	3.09	1.34	1.26	1.03	163.1	77.9	10.3	34.5	0.04	4.85	72	1	170	71	1	0	clopidogrel, aspirin,statin,metoprolol
119.00	58	1	20.25	0.62	2.85	1.45	1.12	1.31	1.02	136.3	64.8	13.7	23	0.014	4	68	1	161	52.5	1	0	statin,clopidogrel,aspirin,metoprolol,trimethazine
124.00	69	1	22.49	0.43	4.93	3.16	1.57	1.32	1.03	167.5	40.3	10.1	55.1	0.11	5.63	96	1	170	65	1	0	aspirin,clopidogrel
127.00	41	1	22.75	1.64	4.8	2.89	1.16	1.16	1.05	755.7	2932.1	101.2	139.2	1.01	7.75	70	1	169	65	0	0	aspirin,clopidogrel,bisoprolol,benazepril
142.00	71	1	24.11	0.9	4.4	2.45	1.54	1.27	0.87	215.4	#NULL!	#NULL!	#NULL!	0.17	4.53	66	1	174	73	0	0	aspirin,clopidogrel,metoprolol,Isosorbide mononitrate,statin
145.00	81	2	23.91	1.43	4.45	2.28	1.52	1.24	0.95	233.2	#NULL!	#NULL!	#NULL!	0.1	5.01	50	1	161	62	1	0	aspirin,clopidogrel
154.00	50	1	21.16	0.91	2.82	1.29	1.12	1.3	1.02	218.3	#NULL!	#NULL!	#NULL!	0.09	4.53	72	1	168	59	1	0	Isosorbide mononitrate,statin,benazepril,metoprolol
156.00	72	2	20.41	1.63	4.16	2.21	1.29	1.28	1.03	190.7	210.6	31.6	55.7	0.09	5.27	66	1	140	40	1	0	aspirin,clopidogrel,metoprolol,statin
157.00	68	1	24.72	1.97	4.67	2.82	0.85	1.31	1.05	168.8	114.9	8.8	68.3	0.13	5.51	58	1	181	81	1	0	aspirin,bisoprolol,benazepril,statin,nimodipine,diltiazem
183.00	33	2	21.1	0.98	2.8	1.03	1.42	1.24	1.12	142.6	39.1	11	16.7	0.03	4.11	87	1	157	52	0	0	aspirin,clopidogrel,statin,diltiazem,metoprolol
184.00	48	2	23.79	1.57	3.37	1.6	1.06	1.04	0.62	262.9	80.1	9.8	12.6	0.08	13.74	71	1	164	64	1	1	aspirin,clopidogrel,Isosorbide mononitrate,dimethyl
185.00	65	1	23.93	1.35	5.14	3.3	1.23	2.1	1.03	386.2	79.6	24.1	38.1	0.08	4.56	#NULL!	1	171	70	0	0	aspirin,clopidogrel,statin,bisoprolol,spironolactone
188.00	67	2	23.43	2.5	3.03	0.92	0.97	1.32	0.99	163.6	55.6	11.7	18.8	0.04	3.83	80	1	160	60	0	0	aspirin,statin,metoprolol,perindopril
192.00	73	1	21.56	2.46	3.76	1.65	0.99	1.24	0.9	193.5	59.2	12	27.8	0.06	4.63	#NULL!	1	164	58	1	0	aspirin,clopidogrel,bisoprolol,benazepril
189.00	54	1	23.99	2.39	4.45	2.34	1.02	1.22	0.64	132.9	91.9	8.7	34.9	0.04	4.25	54	1	178	76	1	0	clopidogrel, perindopril,statin,metoprolol,isosorbide mononitrate,trimetazidine
177.00	61	2	24.39	1.38	6.31	4.41	1.27	1.26	2.32	264.1	194.9	12.4	46.4	0.03	5.55	70	1	162	64	1	0	aspirin,clopidogrel,metoprolol,statin,diltiazem,felodipine,
152.00	64	1	24.67	2	5.31	3.1	1.3	1.24	1.34	163.3	99.9	12.2	30	0.02	8.46	58	1	172	72	0	1	clopidogrel,trimetazidine,statin,diazepam,alprazolam,Insulin aspart
116.00	61	1	23.14	0.58	2.87	1.36	1.48	1.27	0.92	180.6	55.3	17.8	38.2	0.21	4.95	62	1	165	63	0	0	aspirin,clopidogrel,metoprolol
81.00	62.5	1	27.55	1.04	3.17	1.35	1.13	1.06	0.52	173.3	46.7	17.4	34.7	0.82	4.68	85	2	155	65	0	0	aspirin,clopidogrel,metoprolol,statin,perindopril, ranitidine
87.00	79	2	27.33	1.87	5.1	2.63	1.63	1.33	0.58	199.2	68.4	18.4	47	0.78	4.47	80	2	170	78	1	0	aspirin,clopidogrel,metoprolol,statin,perindopril, ranitidine,felodipine
101.00	76	1	28	0.65	3.52	1.61	1.22	1.37	0.83	205.8	73.6	14.3	68.4	0.07	3.22	95	2	150	63	0	0	aspirin,clopidogrel,statin,Isosorbide mononitrate,perindopril
109.00	80	1	27.61	0.42	3.34	1.91	1.15	0.92	0.3	205	56.6	15.5	42.23	0.65	5.64	82	2	167	77	1	0	aspirin,statin,metoprolol,cardiox,furosemide
110.00	78	1	27.94	0.89	3.02	1.01	1.18	1.43	0.68	206	77.1	15	31.3	0.4	5.08	60	2	166	77	0	1	aspirin,metoprolol,acarbose
111.00	55	1	27.85	1.16	3.55	1.32	1.14	1.29	0.74	206	89.7	19	41.7	0.7	5.99	78	2	163	74	0	0	clopidogrel, aspirin,bisoprolol,trimetazidine,statin
113.00	54	1	27.78	2.6	4.06	2.61	1.07	1.16	0.95	202.3	52.3	14.7	35.3	0.81	5.89	87	2	180	90	1	0	aspirin,statin,clopidogrel,metoprolol
121.00	56	1	27.24	0.36	2.97	1.02	2.83	0.88	1	206.2	52.8	16.4	34.6	0.39	5.3	90	2	158	68	1	0	aspirin,statin
122.00	55	1	27.73	2.81	4.23	1.07	0.42	1.07	0.83	164.4	54.2	19.1	29.3	0.3	6.68	70	2	160	71	1	1	aspirin,clopidogrel,trimetazidine,irbesartan,metoprolol,acarbose,statin
126.00	49	1	26.53	3.2	4.67	2.42	0.93	0.93	0.75	172.6	72.2	18.3	34.9	0.67	6.42	100	2	167	74	0	1	aspirin,clopidogrel,metoprolol,statin,perindopril
130.00	61	1	27.68	2.26	3.07	1.21	0.94	0.92	0.56	197.1	99.2	19.1	29.2	0.34	5.17	60	2	170	80	0	0	bisoprolol,aspirin,statin,clopidogrel
133.00	50	1	27.76	0.34	4.76	3.6	1.48	1.07	1.07	166.4	89.3	14.9	29.8	0.43	4.3	57	2	153	65	0	0	diltiazem,aspirin,metoprolol,isosorbide mononitrate
137.00	55	1	26.96	2.6	6.03	4.14	0.62	0.88	1.01	187	54.6	16.2	27.7	0.43	5.11	76	2	169	77	0	0	metoprolol,statin,trimethazine,clopidogrel
141.00	53	1	27.47	0.97	3	1.76	1.14	1.46	0.77	202.5	90.1	18.3	26.9	0.38	#NULL!	70	2	163	73	1	0	clopidogrel,aspirin,metoprolol,trimetazidine,statin,perindopril,aldactone
144.00	70	2	27.26	2.71	5.3	3	1.04	1.45	0.85	185.6	56	15.9	48	0.03	13.57	103	2	152	63	1	1	aspirin,clopidogrel,benazepril,statin,metoprolol,perindopril,isosorbide mononitrate
150.00	56	1	27.28	3	5.13	1.69	0.84	1.42	0.92	206.2	89.1	15.6	29.5	0.04	5.28	70	2	168	77	0	0	aspirin,clopidogrel,statin,perindopril
160.00	65	1	30.79	0.42	4.23	1.42	1.27	1.3	0.73	191.9	73.9	16.7	70.7	0.33	5.71	55	2	170	89	1	0	statin,aspirin,isosorbide mononitrate
164.00	72	1	27.34	1.07	5.3	3.47	0.74	1.01	1.01	204	84	19	47.6	0.12	8.77	84	2	160	70	0	1	statin,aspirin
172.00	57	1	28.85	2.02	3.56	1.99	0.98	1.26	0.71	206.1	87.8	17.2	35.7	0.14	4.34	74	2	180	93.5	1	0	metoprolol,statin,trimethazine,clopidogrel,aspirin,perindopril,isosorbide mononitrate
176.00	58	2	27.51	0.46	4.25	2.43	1.09	1.22	0.72	438.6	260.3	67.1	121.1	1.03	6.13	88	2	164	74	1	0	aspirin,bisoprolol,statin,diltiazem,amlodipine,bisoprolol ,clopidogrel,aldactone
n80	55.5	1	23.5	0.45	2.16	1.64	1.09	1.46	0.33	107.2	62.7	23.9	28.7	#NULL!	4.97	#NULL!	3	175	72	0	0
n84	49	1	24.02	0.89	3.22	2.46	0.92	1.31	0.71	164.2	82.1	24.8	25.8	0.08	5.33	#NULL!	3	167	67	0	0
n90	52	1	23.62	1.03	2.59	1.93	1.06	1.54	0.74	110.5	58.1	46	31.2	0.06	4.98	#NULL!	3	162	62	0	0
n100	58.5	1	22.31	1.32	3.71	2.11	1.68	1.59	0.25	168.5	60.2	16.3	33.5	0.08	4.65	#NULL!	3	166	61.5	0	0
n100	79	1	25.39	1.94	2.14	1.49	1.06	1.27	0.31	124.6	67.6	15.9	27.4	0.19	5.48	#NULL!	3	160	65	0	0
n104	59	1	22.65	1.35	3.58	1.23	1.32	1.28	0.6	166.8	89.4	20	26.3	0.21	5.09	#NULL!	3	160	58	0	0
n107	47	1	23.53	0.32	2.74	2.32	1.21	1.23	0.6	190.6	71.5	18.7	24.6	0.15	4.25	#NULL!	3	170	68	0	0
n111	73	1	23.94	1.34	2.94	2.56	1	1.2	0.21	143.6	86.5	68.4	61.9	#NULL!	4.65	#NULL!	3	171	70	1	0	aldactone
n113	73	1	24.3	2.59	4.04	2.37	0.95	1.42	0.27	#NULL!	#NULL!	#NULL!	#NULL!	#NULL!	5.52	#NULL!	3	161	63	0	0
n117	67	1	23.24	2.7	3.15	2.16	1.04	1.49	0.92	228.8	67.3	17.3	23	#NULL!	5.58	#NULL!	3	162	61	1	0	aldactone
n123	79	2	24.23	0.42	3.08	2.31	1.64	1.13	0.68	118.9	73.5	15.6	32.5	0.09	4.01	#NULL!	3	152	56	1	0	nimodipine
n130	54	2	21.93	0.61	2.52	1.57	1.28	1.25	0.77	116.2	56.5	17.1	21.6	0.17	4.53	#NULL!	3	162	57.5	0	0
n133	58	2	23.12	2.07	3.45	1.39	1.67	1.21	1.09	#NULL!	#NULL!	#NULL!	#NULL!	#NULL!	5.53	#NULL!	3	157	57	1	0
n138	50.5	2	24.62	0.69	4.22	2.12	1.72	1.18	1.16	190.1	78.6	19	35.9	0.27	4.87	#NULL!	3	154	58.4	0	0
n150	39	2	23.92	0.47	4.01	2.67	1.37	#NULL!	#NULL!	145.2	90.4	18.5	34.6	#NULL!	5.55	#NULL!	3	161	62	1	0
n160	71	2	23.43	1.5	4.51	2.06	1.38	1.32	0.7	236.9	81.8	20.8	46.6	0.43	5.35	#NULL!	3	160	60	1	0	amlodipine
