# Supplementary material for: A Metabonomics Profiling Study on Phlegm Syndrome and Blood-Stasis Syndrome in Coronary Heart Disease Patients Using Liquid Chromatography/Quadrupole Time-of-Flight Mass Spectrometry
Source: Evid Based Complement Alternat Med. 2014 Jul 20;2014:385102. doi: 10.1155/2014/385102 (PMC4129150; doi:10.1155/2014/385102)
Supplement: Supplementary file 1 — The Supplementary Material Depicted the Clinical Data and Treatment of Each Coronary Heart Disease Patients and Healthy Control. [file 385102.f1.zip › mat.385102.v3.xls]

## Sheet: table1
No.	Age(years)	Gender	BMI(kg/m2)	TG(mmol/L)	TC(mmol/L)	LDL (mmol/L)	HDL (mmol/L)	Apo(a1)（g/L）	Apo (b)（g/L）	LDH(U/L)	CK(U/L)	CKMB(U/L)	Myoglobin (ug/L)	CTn1 (ug/L)	Glucose(mmol/L)	HR(bpm)	Group	Height(cm)	Weight(kg)	Hypertension	Diabetes	Drugs
103	71	Female	23.6	3.26	3.5	1.22	0.7	1.33	0.99	164.2	71.7	19.2	30.3	0.06	4.52	60	blood stasis	147	51	no	no	clopidogrel, Lumbrukinase, fenofibrate, Micardis, aspirin
107	53	male	24.3	3.8	4.33	1.68	0.92	1.08	0.95	212.6	49.4	13	41	0.04	4.56	60	blood stasis	178	77	yes	no	clopidogrel, atorvastatin, Micardis, aspirin
115	61	male	24.57	0.75	4.77	3.09	1.34	1.26	1.03	163.1	77.9	10.3	34.5	0.04	4.85	72	blood stasis	170	71	yes	no	clopidogrel, aspirin, statin, metoprolol
119	58	male	20.25	0.62	2.85	1.45	1.12	1.31	1.02	136.3	64.8	13.7	23	0.014	4	68	blood stasis	161	52.5	yes	no	statin, clopidogrel, aspirin, metoprolol, trimethazine
124	69	male	22.49	0.43	4.93	3.16	1.57	1.32	1.03	167.5	40.3	10.1	55.1	0.11	5.63	96	blood stasis	170	65	yes	no	aspirin, clopidogrel
127	41	male	22.75	1.64	4.8	2.89	1.16	1.16	1.05	755.7	2932.1	101.2	139.2	1.01	7.75	70	blood stasis	169	65	no	no	aspirin, clopidogrel, bisoprolol, benazepril
142	71	male	24.11	0.9	4.4	2.45	1.54	1.27	0.87	215.4	null	null	null	0.17	4.53	66	blood stasis	174	73	no	no	aspirin, clopidogrel, metoprolol, Isosorbide mononitrate, statin
145	81	female	23.91	1.43	4.45	2.28	1.52	1.24	0.95	233.2	null	null	null	0.1	5.01	50	blood stasis	161	62	yes	no	aspirin, clopidogrel
154	50	male	21.16	0.91	2.82	1.29	1.12	1.3	1.02	218.3	null	null	null	0.09	4.53	72	blood stasis	168	59	yes	no	Isosorbide mononitrate, statin, benazepril, metoprolol
156	72	female	20.41	1.63	4.16	2.21	1.29	1.28	1.03	190.7	210.6	31.6	55.7	0.09	5.27	66	blood stasis	140	40	yes	no	aspirin, clopidogrel, metoprolol, statin
157	68	male	24.72	1.97	4.67	2.82	0.85	1.31	1.05	168.8	114.9	8.8	68.3	0.13	5.51	58	blood stasis	181	81	yes	no	aspirin, bisoprolol, benazepril, statin, nimodipine, diltiazem
183	33	female	21.1	0.98	2.8	1.03	1.42	1.24	1.12	142.6	39.1	11	16.7	0.03	4.11	87	blood stasis	157	52	no	no	aspirin, clopidogrel, statin, diltiazem, metoprolol
184	48	female	23.79	1.57	3.37	1.6	1.06	1.04	0.62	262.9	80.1	9.8	12.6	0.08	13.74	71	blood stasis	164	64	yes	yes	aspirin, clopidogrel, Isosorbide mononitrate, dimethyl
185	65	male	23.93	1.35	5.14	3.3	1.23	2.1	1.03	386.2	79.6	24.1	38.1	0.08	4.56	null	blood stasis	171	70	no	no	aspirin, clopidogrel, statin, bisoprolol, spironolactone
188	67	female	23.43	2.5	3.03	0.92	0.97	1.32	0.99	163.6	55.6	11.7	18.8	0.04	3.83	80	blood stasis	160	60	no	no	aspirin, statin, metoprolol, perindopril
192	73	male	21.56	2.46	3.76	1.65	0.99	1.24	0.9	193.5	59.2	12	27.8	0.06	4.63	null	blood stasis	164	58	yes	no	aspirin, clopidogrel, bisoprolol, benazepril
189	54	male	23.99	2.39	4.45	2.34	1.02	1.22	0.64	132.9	91.9	8.7	34.9	0.04	4.25	54	blood stasis	178	76	yes	no	clopidogrel, perindopril, statin, metoprolol, isosorbide mononitrate, trimetazidine
177	61	female	24.39	1.38	6.31	4.41	1.27	1.26	2.32	264.1	194.9	12.4	46.4	0.03	5.55	70	blood stasis	162	64	yes	no	aspirin, clopidogrel, metoprolol, statin, diltiazem, felodipine
152	64	male	24.67	2	5.31	3.1	1.3	1.24	1.34	163.3	99.9	12.2	30	0.02	8.46	58	blood stasis	172	72	no	yes	clopidogrel, trimetazidine, statin, diazepam, alprazolam, Insulin aspart
116	61	male	23.14	0.58	2.87	1.36	1.48	1.27	0.92	180.6	55.3	17.8	38.2	0.21	4.95	62	blood stasis	165	63	no	no	aspirin, clopidogrel, metoprolol
81	62.5	male	27.55	1.04	3.17	1.35	1.13	1.06	0.52	173.3	46.7	17.4	34.7	0.82	4.68	85	phlegm	155	65	no	no	aspirin, clopidogrel, metoprolol, statin, perindopril, ranitidine
87	79	female	27.33	1.87	5.1	2.63	1.63	1.33	0.58	199.2	68.4	18.4	47	0.78	4.47	80	phlegm	170	78	yes	no	aspirin, clopidogrel, metoprolol, statin, perindopril, ranitidine, felodipine
101	76	male	28	0.65	3.52	1.61	1.22	1.37	0.83	205.8	73.6	14.3	68.4	0.07	3.22	95	phlegm	150	63	no	no	aspirin, clopidogrel, statin, Isosorbide mononitrate, perindopril
109	80	male	27.61	0.42	3.34	1.91	1.15	0.92	0.3	205	56.6	15.5	42.23	0.65	5.64	82	phlegm	167	77	yes	no	aspirin, statin, metoprolol, cardiox, furosemide
110	78	male	27.94	0.89	3.02	1.01	1.18	1.43	0.68	206	77.1	15	31.3	0.4	5.08	60	phlegm	166	77	no	yes	aspirin, metoprolol, acarbose
111	55	male	27.85	1.16	3.55	1.32	1.14	1.29	0.74	206	89.7	19	41.7	0.7	5.99	78	phlegm	163	74	no	no	clopidogrel, aspirin, bisoprolol, trimetazidine, statin
113	54	male	27.78	2.6	4.06	2.61	1.07	1.16	0.95	202.3	52.3	14.7	35.3	0.81	5.89	87	phlegm	180	90	yes	no	aspirin, statin, clopidogrel, metoprolol
121	56	male	27.24	0.36	2.97	1.02	2.83	0.88	1	206.2	52.8	16.4	34.6	0.39	5.3	90	phlegm	158	68	yes	no	aspirin, statin
122	55	male	27.73	2.81	4.23	1.07	0.42	1.07	0.83	164.4	54.2	19.1	29.3	0.3	6.68	70	phlegm	160	71	yes	yes	aspirin, clopidogrel, trimetazidine, irbesartan, metoprolol, acarbose, statin
126	49	male	26.53	3.2	4.67	2.42	0.93	0.93	0.75	172.6	72.2	18.3	34.9	0.67	6.42	100	phlegm	167	74	no	yes	aspirin, clopidogrel, metoprolol, statin, perindopril
130	61	male	27.68	2.26	3.07	1.21	0.94	0.92	0.56	197.1	99.2	19.1	29.2	0.34	5.17	60	phlegm	170	80	no	no	bisoprolol, aspirin, statin, clopidogrel
133	50	male	27.76	0.34	4.76	3.6	1.48	1.07	1.07	166.4	89.3	14.9	29.8	0.43	4.3	57	phlegm	153	65	no	no	diltiazem, aspirin, metoprolol, isosorbide mononitrate
137	55	male	26.96	2.6	6.03	4.14	0.62	0.88	1.01	187	54.6	16.2	27.7	0.43	5.11	76	phlegm	169	77	no	no	metoprolol, statin, trimethazine, clopidogrel
141	53	male	27.47	0.97	3	1.76	1.14	1.46	0.77	202.5	90.1	18.3	26.9	0.38	null	70	phlegm	163	73	no	no	clopidogrel, aspirin, metoprolol, trimetazidine, statin, perindopril, aldactone
144	70	Female	27.26	2.71	5.3	3	1.04	1.45	0.85	185.6	56	15.9	48	0.03	13.57	103	phlegm	152	63	yes	yes	aspirin, clopidogrel, benazepril, statin, metoprolol, perindopril, isosorbide mononitrate
150	56	male	27.28	3	5.13	1.69	0.84	1.42	0.92	206.2	89.1	15.6	29.5	0.04	5.28	70	phlegm	168	77	no	no	aspirin, clopidogrel, statin, perindopril
160	65	male	30.79	0.42	4.23	1.42	1.27	1.3	0.73	191.9	73.9	16.7	70.7	0.33	5.71	55	phlegm	170	89	yes	no	statin, aspirin, isosorbide mononitrate
164	72	male	27.34	1.07	5.3	3.47	0.74	1.01	1.01	204	84	19	47.6	0.12	8.77	84	phlegm	160	70	no	yes	statin, aspirin
172	57	male	28.85	2.02	3.56	1.99	0.98	1.26	0.71	206.1	87.8	17.2	35.7	0.14	4.34	74	phlegm	180	93.5	yes	no	metoprolol, statin, trimethazine, clopidogrel, aspirin, perindopril, isosorbide mononitrate
176	58	female	27.51	0.46	4.25	2.43	1.09	1.22	0.72	438.6	260.3	67.1	121.1	1.03	6.13	88	phlegm	164	74	yes	no	aspirin, bisoprolol, statin, diltiazem, amlodipine, bisoprolol , clopidogrel, aldactone
n80	55.5	male	23.5	0.45	2.16	1.64	1.09	1.46	0.33	107.2	62.7	23.9	28.7	null	4.97	null	control	175	72	no	no
n84	49	male	24.02	0.89	3.22	2.46	0.92	1.31	0.71	164.2	82.1	24.8	25.8	0.08	5.33	null	control	167	67	no	no
n90	52	male	23.62	1.03	2.59	1.93	1.06	1.54	0.74	110.5	58.1	46	31.2	0.06	4.98	null	control	162	62	no	no
n100	58.5	male	22.31	1.32	3.71	2.11	1.68	1.59	0.25	168.5	60.2	16.3	33.5	0.08	4.65	null	control	166	61.5	no	no
n100	79	male	25.39	1.94	2.14	1.49	1.06	1.27	0.31	124.6	67.6	15.9	27.4	0.19	5.48	null	control	160	65	no	no
n104	59	male	22.65	1.35	3.58	1.23	1.32	1.28	0.6	166.8	89.4	20	26.3	0.21	5.09	null	control	160	58	no	no
n107	47	male	23.53	0.32	2.74	2.32	1.21	1.23	0.6	190.6	71.5	18.7	24.6	0.15	4.25	null	control	170	68	no	no
n111	73	male	23.94	1.34	2.94	2.56	1	1.2	0.21	143.6	86.5	68.4	61.9	null	4.65	null	control	171	70	yes	no	aldactone
n113	73	male	24.3	2.59	4.04	2.37	0.95	1.42	0.27	null	null	null	null	null	5.52	null	control	161	63	no	no
n117	67	male	23.24	2.7	3.15	2.16	1.04	1.49	0.92	228.8	67.3	17.3	23	null	5.58	null	control	162	61	yes	no	aldactone
n123	79	female	24.23	0.42	3.08	2.31	1.64	1.13	0.68	118.9	73.5	15.6	32.5	0.09	4.01	null	control	152	56	yes	no	nimodipine
n130	54	female	21.93	0.61	2.52	1.57	1.28	1.25	0.77	116.2	56.5	17.1	21.6	0.17	4.53	null	control	162	57.5	no	no
n133	58	female	23.12	2.07	3.45	1.39	1.67	1.21	1.09	null	null	null	null	null	5.53	null	control	157	57	yes	no
n138	50.5	female	24.62	0.69	4.22	2.12	1.72	1.18	1.16	190.1	78.6	19	35.9	0.27	4.87	null	control	154	58.4	no	no
n150	39	female	23.92	0.47	4.01	2.67	1.37	null	null	145.2	90.4	18.5	34.6	null	5.55	null	control	161	62	yes	no
n160	71	female	23.43	1.5	4.51	2.06	1.38	1.32	0.7	236.9	81.8	20.8	46.6	0.43	5.35	null	control	160	60	yes	no	amlodipine
